# Supplementary material for: Unveiling Spatial Epidemiology of HIV with Mobile Phone Data
Source: PubMed Central journal article supplement (PMC4725841; doi:10.1038/srep19342), 2016-01-13
Supplement: srep19342-s1.pdf [file srep19342-s1.pdf]

# Unveiling Spatial Epidemiology of HIV with Mobile Phone Data

## Supplementary Information

Sanja Brdar<sup>1,+</sup>, Katarina Gavrić<sup>1,+</sup>, Dubravko Čulibrk<sup>1,2</sup>, and Vladimir Crnojević<sup>1</sup>

<sup>1</sup>Faculty of Technical Sciences, University of Novi Sad, Serbia

<sup>2</sup>Department of Information Engineering and Computer Science, University of Trento, Italy

<sup>+</sup>these authors contributed equally to this work

August 11, 2015

In this document we provide following supplementary information:

### Ivory Coast departments map

Figure [S1](#) shows boundaries of Ivory Coast departments with corresponding *id* numbers used in our study.

### Features Description

Tables [S2](#) and [S3](#) display the feature names and their descriptions. The marked features (\*) are those included in the best SVR-RFE models.

### HIV estimates

HIV estimates at department level from national population-based surveys (source Joseph Larmarange and Victoria Bendaud, AIDS 2014) are provided in Table [S1](#).

### Features Contribution

Figure [S2](#) reveals results of features contribution analysis for features ranked from 4<sup>th</sup> to 6<sup>th</sup> place in recursive feature elimination procedure.

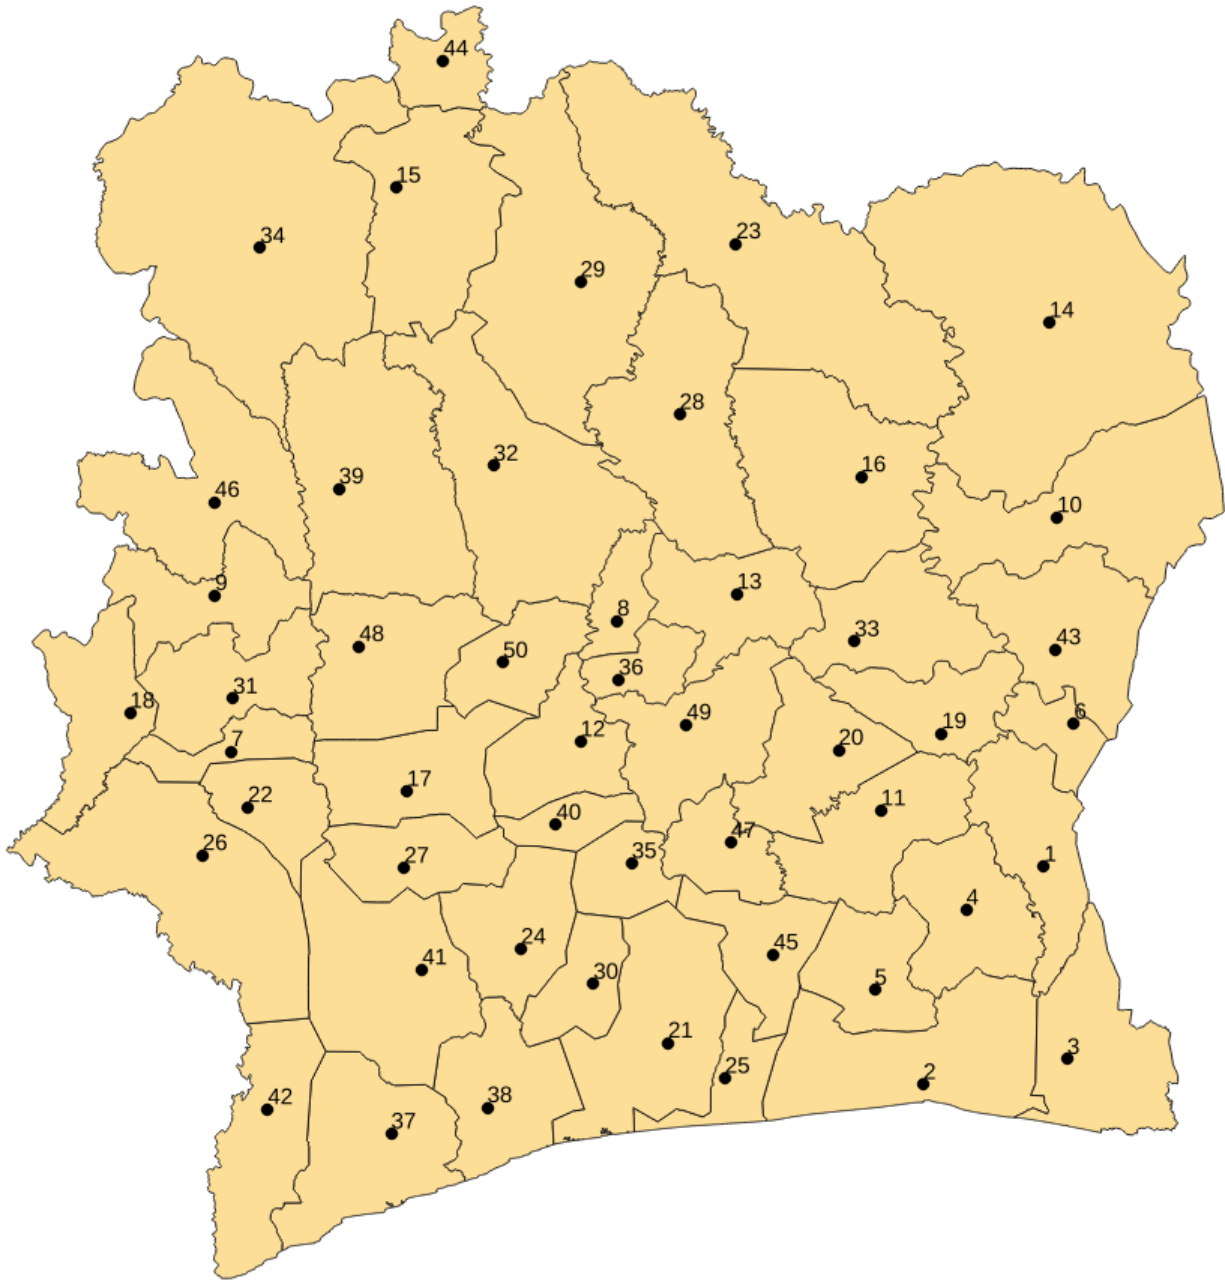

Figure S1: Departments of Ivory Coast. We used open source QGIS software (<http://www.qgis.org>) to create map.

Table S1: HIV prevalence estimates with quality indicators

| Department ID | Department Name | HIV prevalence | Quality         |
|---------------|-----------------|----------------|-----------------|
| 1             | Abengourou      | 2.70           | good            |
| 2             | Abidjan         | 3.60           | good            |
| 3             | Aboisso         | 3.20           | uncertain       |
| 4             | Adzopé          | 4.70           | uncertain       |
| 5             | Agboville       | 3.10           | uncertain       |
| 6             | Agnibilkrou     | 3.20           | moderately good |
| 7             | Bangolo         | 3.30           | uncertain       |
| 8             | Béoumi          | 2.50           | uncertain       |
| 9             | Biankouma       | 2.00           | uncertain       |
| 10            | Bondoukou       | 1.70           | moderately good |
| 11            | Bongouanou      | 3.30           | uncertain       |
| 12            | Bouaflé         | 2.50           | uncertain       |
| 13            | Bouaké          | 3.10           | good            |
| 14            | Bouna           | 2.00           | uncertain       |
| 15            | Boundiali       | 1.40           | uncertain       |
| 16            | Dabakala        | 2.50           | uncertain       |
| 17            | Daloa           | 1.90           | uncertain       |
| 18            | Danané          | 2.10           | uncertain       |
| 19            | Daoukro         | 3.80           | uncertain       |
| 20            | Dimbokro        | 2.30           | uncertain       |
| 21            | Divo            | 2.00           | uncertain       |
| 22            | Duékoué         | 3.80           | uncertain       |
| 23            | Ferkessédougou  | 2.90           | uncertain       |
| 24            | Gagnoa          | 2.00           | uncertain       |
| 25            | Grand-Lahou     | 2.20           | uncertain       |
| 26            | Guiglo          | 3.20           | moderately good |
| 27            | Issia           | 1.90           | uncertain       |
| 28            | Katiola         | 4.00           | uncertain       |
| 29            | Korhogo         | 2.30           | good            |
| 30            | Lakota          | 2.00           | uncertain       |
| 31            | Man             | 2.80           | moderately good |
| 32            | Mankono         | 2.10           | moderately good |
| 33            | Mbahiakro       | 3.00           | uncertain       |
| 34            | Odienné         | 1.70           | moderately good |
| 35            | Oumé            | 2.50           | uncertain       |
| 36            | Sakassou        | 1.70           | uncertain       |
| 37            | San-Pédro       | 3.30           | moderately good |
| 38            | Sassandra       | 3.50           | uncertain       |
| 39            | Séguéla         | 1.80           | uncertain       |
| 40            | Sinfra          | 2.50           | uncertain       |
| 41            | Soubré          | 2.80           | moderately good |
| 42            | Tabou           | 5.70           | uncertain       |
| 43            | Tanda           | 2.10           | moderately good |
| 44            | Tengréla        | 0.60           | uncertain       |
| 45            | Tiassalé        | 2.60           | uncertain       |
| 46            | Touba           | 1.60           | moderately good |
| 47            | Toumodi         | 2.60           | uncertain       |
| 48            | Vavoua          | 1.30           | uncertain       |
| 49            | Yamoussoukro    | 3.10           | moderately good |
| 50            | Zuénoula        | 1.10           | uncertain       |

Table S2: Features descriptions for SET1.

| <b>Feature Name</b>          | <b>Description</b>                                                                                         |
|------------------------------|------------------------------------------------------------------------------------------------------------|
| Connectivity-Inner*          | Sum of inner calls in department divided by population of department                                       |
| Connectivity-Orig*           | Sum of calls originating from department divided by population of department                               |
| Connectivity-Term*           | Sum of calls terminating in department divided by population of department                                 |
| Connectivity-All*            | Sum of all calls in department divided by population of department                                         |
| Connectivity-Weekday*        | Sum of all calls in department during weekdays divided by population of department                         |
| Connectivity-Weekend         | Sum of all calls in department during weekends divided by population of department                         |
| Connectivity-Weekday-00-08h  | Sum of all calls in department during weekdays in 00-08h time interval divided by population of department |
| Connectivity-Weekday-08-16h* | Sum of all calls in department during weekdays in 08-16h time interval divided by population of department |
| Connectivity-Weekday-16-24h* | Sum of all calls in department during weekdays in 16-24h time interval divided by population of department |
| Connectivity-Weekend-00-08h* | Sum of all calls in department during weekends in 00-08h time interval divided by population of department |
| Connectivity-Weekend-08-16h  | Sum of all calls in department during weekends in 08-16h time interval divided by population of department |
| Connectivity-Weekend-16-24h  | Sum of all calls in department during weekends in 16-24h time interval divided by population of department |
| Connectivity-Weekday-00h     | Sum of all calls in department during weekdays in 00-01h time interval divided by population of department |
| Connectivity-Weekday-01h*    | Sum of all calls in department during weekdays in 01-02h time interval divided by population of department |
| Connectivity-Weekday-02h*    | Sum of all calls in department during weekdays in 02-03h time interval divided by population of department |
| Connectivity-Weekday-03h*    | Sum of all calls in department during weekdays in 03-04h time interval divided by population of department |
| Connectivity-Weekday-04h     | Sum of all calls in department during weekdays in 04-05h time interval divided by population of department |
| Connectivity-Weekday-05h     | Sum of all calls in department during weekdays in 05-06h time interval divided by population of department |
| Connectivity-Weekday-06h*    | Sum of all calls in department during weekdays in 06-07h time interval divided by population of department |
| Connectivity-Weekday-07h     | Sum of all calls in department during weekdays in 07-08h time interval divided by population of department |
| Connectivity-Weekday-08h*    | Sum of all calls in department during weekdays in 08-09h time interval divided by population of department |
| Connectivity-Weekday-09h*    | Sum of all calls in department during weekdays in 09-10h time interval divided by population of department |
| Connectivity-Weekday-10h*    | Sum of all calls in department during weekdays in 10-11h time interval divided by population of department |
| Connectivity-Weekday-11h*    | Sum of all calls in department during weekdays in 11-12h time interval divided by population of department |
| Connectivity-Weekday-12h*    | Sum of all calls in department during weekdays in 12-13h time interval divided by population of department |

| <b>Feature Name</b>       | <b>Description</b>                                                                                         |
|---------------------------|------------------------------------------------------------------------------------------------------------|
| Connectivity-Weekday-13h* | Sum of all calls in department during weekdays in 13-14h time interval divided by population of department |
| Connectivity-Weekday-14h* | Sum of all calls in department during weekdays in 14-15h time interval divided by population of department |
| Connectivity-Weekday-15h* | Sum of all calls in department during weekdays in 15-16h time interval divided by population of department |
| Connectivity-Weekday-16h* | Sum of all calls in department during weekdays in 16-17h time interval divided by population of department |
| Connectivity-Weekday-17h* | Sum of all calls in department during weekdays in 17-18h time interval divided by population of department |
| Connectivity-Weekday-18h  | Sum of all calls in department during weekdays in 18-19h time interval divided by population of department |
| Connectivity-Weekday-19h  | Sum of all calls in department during weekdays in 19-20h time interval divided by population of department |
| Connectivity-Weekday-20h  | Sum of all calls in department during weekdays in 20-21h time interval divided by population of department |
| Connectivity-Weekday-21h  | Sum of all calls in department during weekdays in 21-22h time interval divided by population of department |
| Connectivity-Weekday-22h  | Sum of all calls in department during weekdays in 22-23h time interval divided by population of department |
| Connectivity-Weekday-23h* | Sum of all calls in department during weekdays in 23-00h time interval divided by population of department |
| Connectivity-Weekend-00h* | Sum of all calls in department during weekends in 00-01h time interval divided by population of department |
| Connectivity-Weekend-01h* | Sum of all calls in department during weekends in 01-02h time interval divided by population of department |
| Connectivity-Weekend-02h* | Sum of all calls in department during weekends in 02-03h time interval divided by population of department |
| Connectivity-Weekend-03h* | Sum of all calls in department during weekends in 03-04h time interval divided by population of department |
| Connectivity-Weekend-04h  | Sum of all calls in department during weekends in 04-05h time interval divided by population of department |
| Connectivity-Weekend-05h  | Sum of all calls in department during weekends in 05-06h time interval divided by population of department |
| Connectivity-Weekend-06h* | Sum of all calls in department during weekends in 06-07h time interval divided by population of department |
| Connectivity-Weekend-07h* | Sum of all calls in department during weekends in 07-08h time interval divided by population of department |
| Connectivity-Weekend-08h  | Sum of all calls in department during weekends in 08-09h time interval divided by population of department |
| Connectivity-Weekend-09h* | Sum of all calls in department during weekends in 09-10h time interval divided by population of department |
| Connectivity-Weekend-10h* | Sum of all calls in department during weekends in 10-11h time interval divided by population of department |
| Connectivity-Weekend-11h* | Sum of all calls in department during weekends in 11-12h time interval divided by population of department |
| Connectivity-Weekend-12h  | Sum of all calls in department during weekends in 12-13h time interval divided by population of department |
| Connectivity-Weekend-13h  | Sum of all calls in department during weekends in 13-14h time interval divided by population of department |
| Connectivity-Weekend-14h  | Sum of all calls in department during weekends in 14-15h time interval divided by population of department |

| <b>Feature Name</b>                   | <b>Description</b>                                                                                             |
|---------------------------------------|----------------------------------------------------------------------------------------------------------------|
| Connectivity-Weekend-15h              | Sum of all calls in department during weekends in 15-16h time interval divided by population of department     |
| Connectivity-Weekend-16h              | Sum of all calls in department during weekends in 16-17h time interval divided by population of department     |
| Connectivity-Weekend-17h*             | Sum of all calls in department during weekends in 17-18h time interval divided by population of department     |
| Connectivity-Weekend-18h              | Sum of all calls in department during weekends in 18-19h time interval divided by population of department     |
| Connectivity-Weekend-19h              | Sum of all calls in department during weekends in 19-20h time interval divided by population of department     |
| Connectivity-Weekend-20h              | Sum of all calls in department during weekends in 20-21h time interval divided by population of department     |
| Connectivity-Weekend-21h              | Sum of all calls in department during weekends in 21-22h time interval divided by population of department     |
| Connectivity-Weekend-22h              | Sum of all calls in department during weekends in 22-23h time interval divided by population of department     |
| Connectivity-Weekend-23h              | Sum of all calls in department during weekends in 23-00h time interval divided by population of department     |
| Average-Inner-Call-Duration           | Sum of durations of inner calls in department divided by number of calls                                       |
| Average-Orig-Call-Duration            | Sum of durations of originating calls in department divided by number of calls                                 |
| Average-Term-Call-Duration            | Sum of durations of originating calls in department divided by number of calls                                 |
| Average-Call-Duration                 | Sum of durations of all calls in department divided by number of calls                                         |
| Average-Call-Duration-Weekday         | Sum of durations of all calls in department during weekdays divided by number of calls                         |
| Average-Call-Duration-Weekend*        | Sum of durations of all calls in department during weekends divided by number of calls                         |
| Average-Call-Duration-Weekday-00-08h* | Sum of durations of all calls in department during weekdays in time interval 00-08h divided by number of calls |
| Average-Call-Duration-Weekday-08-16h  | Sum of durations of all calls in department during weekdays in time interval 08-16h divided by number of calls |
| Average-Call-Duration-Weekday-16-24h  | Sum of durations of all calls in department during weekdays in time interval 16-24h divided by number of calls |
| Average-Call-Duration-Weekend-00-08h* | Sum of durations of all calls in department during weekends in time interval 00-08h divided by number of calls |
| Average-Call-Duration-Weekend-08-16h* | Sum of durations of all calls in department during weekends in time interval 08-16h divided by number of calls |
| Average-Call-Duration-Weekend-16-24h  | Sum of durations of all calls in department during weekends in time interval 16-24h divided by number of calls |
| Average-Call-Duration-Weekday-00h     | Sum of durations of all calls in department during weekdays in time interval 00-01h divided by number of calls |
| Average-Call-Duration-Weekday-01h*    | Sum of durations of all calls in department during weekdays in time interval 01-02h divided by number of calls |
| Average-Call-Duration-Weekday-02h*    | Sum of durations of all calls in department during weekdays in time interval 02-03h divided by number of calls |
| Average-Call-Duration-Weekday-03h*    | Sum of durations of all calls in department during weekdays in time interval 03-04h divided by number of calls |
| Average-Call-Duration-Weekday-04h     | Sum of durations of all calls in department during weekdays in time interval 04-05h divided by number of calls |



| <b>Feature Name</b>                | <b>Description</b>                                                                                             |
|------------------------------------|----------------------------------------------------------------------------------------------------------------|
| Average-Call-Duration-Weekend-07h* | Sum of durations of all calls in department during weekends in time interval 07-08h divided by number of calls |
| Average-Call-Duration-Weekend-08h* | Sum of durations of all calls in department during weekends in time interval 08-09h divided by number of calls |
| Average-Call-Duration-Weekend-09h  | Sum of durations of all calls in department during weekends in time interval 09-10h divided by number of calls |
| Average-Call-Duration-Weekend-10h  | Sum of durations of all calls in department during weekends in time interval 10-11h divided by number of calls |
| Average-Call-Duration-Weekend-11h  | Sum of durations of all calls in department during weekends in time interval 11-12h divided by number of calls |
| Average-Call-Duration-Weekend-12h* | Sum of durations of all calls in department during weekends in time interval 12-13h divided by number of calls |
| Average-Call-Duration-Weekend-13h* | Sum of durations of all calls in department during weekends in time interval 13-14h divided by number of calls |
| Average-Call-Duration-Weekend-14h* | Sum of durations of all calls in department during weekends in time interval 14-15h divided by number of calls |
| Average-Call-Duration-Weekend-15h* | Sum of durations of all calls in department during weekends in time interval 15-16h divided by number of calls |
| Average-Call-Duration-Weekend-16h* | Sum of durations of all calls in department during weekends in time interval 16-17h divided by number of calls |
| Average-Call-Duration-Weekend-17h  | Sum of durations of all calls in department during weekends in time interval 17-18h divided by number of calls |
| Average-Call-Duration-Weekend-18h  | Sum of durations of all calls in department during weekends in time interval 18-19h divided by number of calls |
| Average-Call-Duration-Weekend-19h  | Sum of durations of all calls in department during weekends in time interval 19-20h divided by number of calls |
| Average-Call-Duration-Weekend-20h  | Sum of durations of all calls in department during weekends in time interval 20-21h divided by number of calls |
| Average-Call-Duration-Weekend-21h  | Sum of durations of all calls in department during weekends in time interval 21-22h divided by number of calls |
| Average-Call-Duration-Weekend-22h  | Sum of durations of all calls in department during weekends in time interval 22-23h divided by number of calls |
| Average-Call-Duration-Weekend-23h* | Sum of durations of all calls in department during weekends in time interval 23-00h divided by number of calls |

Table S3: Features descriptions for SET3.

| <b>Feature Name</b>     | <b>Description</b>                                                                                                       |
|-------------------------|--------------------------------------------------------------------------------------------------------------------------|
| Gyration-All            | 95 percentile of the distribution of user's radius of gyration for all visited locations                                 |
| Gyration-Night*         | 95 percentile of the distribution of user's radius of gyration for locations visited during night hours 22h-05h          |
| Gyration-Weekday        | 95 percentile of the distribution of user's radius of gyration for locations visited during weekdays                     |
| Gyration-Weekday-Night* | 95 percentile of the distribution of user's radius of gyration for locations visited during weekdays night hours 22h-05h |
| Gyration-Weekend        | 95 percentile of the distribution of user's radius of gyration for locations visited during weekend hours                |
| Gyration-Weekend-Night* | 95 percentile of the distribution of user's radius of gyration for locations visited during weekend night hours 22h-05h  |
| Diameter-All            | 95 percentile of the distribution of user's diameter of convex hull for all visited locations                            |



| <b>Feature Name</b>     | <b>Description</b>                                                                                                            |
|-------------------------|-------------------------------------------------------------------------------------------------------------------------------|
| Diameter-Night          | 95 percentile of the distribution of user's diameter of convex hull for locations visited during night hours 22h-05h          |
| Diameter-Weekday        | 95 percentile of the distribution of user's diameter of convex hull for locations visited during weekdays                     |
| Diameter-Weekday-Night  | 95 percentile of the distribution of user's diameter of convex hull for locations visited during weekdays night hours 22h-05h |
| Diameter-Weekend        | 95 percentile of the distribution of user's diameter of convex hull for locations visited during weekend hours                |
| Diameter-Weekend-Night  | 95 percentile of the distribution of user's diameter of convex hull for locations visited during weekend night hours 22h-05h  |
| Area-All                | 95 percentile of the distribution of user's area of convex hull for all visited locations                                     |
| Area-Night              | 95 percentile of the distribution of user's area of convex hull for locations visited during night hours 22h-05h              |
| Area-Weekday*           | Locations visited during weekday hours                                                                                        |
| Area-Weekday-Night*     | Locations visited during weekday night hours                                                                                  |
| Area-Weekend*           | Locations visited during weekend hours                                                                                        |
| Area-Weekend-Night      | Locations visited during weekend night hours                                                                                  |
| Perimeter-All           | 95 percentile of the distribution of user's perimeter of convex hull for all visited locations                                |
| Perimeter-Night         | 95 percentile of the distribution of user's perimeter of convex hull during night hours                                       |
| Perimeter-Weekday       | 95 percentile of the distribution of user's perimeter of convex hull during weekday hours                                     |
| Perimeter-Weekday-Night | 95 percentile of the distribution of user's perimeter of convex hull during weekday night hours                               |
| Perimeter-Weekend       | 95 percentile of the distribution of user's perimeter of convex hull during weekend hours                                     |
| Perimeter-Weekend-Night | 95 percentile of the distribution of user's perimeter of convex hull during weekend night hours                               |
| Distance-All            | 95 percentile of the distribution of user's sum of distances derived from sequences of visited locations                      |
| Out-Migration-Overall*  | Sum of all users' mobilities out of home department divided by population of home department                                  |
| Out-Migration-1day      | Sum of users' mobilities out of home department that last more than 1 day divided by population of home department            |
| Out-Migration-2days     | Sum of users' mobilities out of home department that last more than 2 days divided by population of home department           |
| Out-Migration-3days     | Sum of users' mobilities out of home department that last more than 3 days divided by population of home department           |
| Out-Migration-4days     | Sum of users' mobilities out of home department that last more than 4 days divided by population of home department           |
| Out-Migration-5days     | Sum of users' mobilities out of home department that last more than 5 days divided by population of home department           |
| Out-Migration-6days     | Sum of users' mobilities out of home department that last more than 6 days divided by population of home department           |
| Out-Migration-7days     | Sum of users' mobilities out of home department that last more than 7 days divided by population of home department           |
| Out-Migration-8days     | Sum of users' mobilities out of home department that last more than 8 days divided by population of home department           |
| Out-Migration-9days     | Sum of users' mobilities out of home department that last more than 9 days divided by population of home department           |

| <b>Feature Name</b>     | <b>Description</b>                                                                                                                            |
|-------------------------|-----------------------------------------------------------------------------------------------------------------------------------------------|
| Out-Migration-10days*   | Sum of users' mobilities out of home department that last more than 10 days divided by population of home department                          |
| In-Migration-Overall*   | Sum of all users' mobilities into observed department from other departments divided by corresponding populations                             |
| In-Migration-1day       | Sum of all users' mobilities into observed department from other departments that last more than 1 day divided by corresponding populations   |
| In-Migration-2day       | Sum of all users' mobilities into observed department from other departments that last more than 2 day divided by corresponding populations   |
| In-Migration-3day       | Sum of all users' mobilities into observed department from other departments that last more than 3 day divided by corresponding populations   |
| In-Migration-4day       | Sum of all users' mobilities into observed department from other departments that last more than 4 day divided by corresponding populations   |
| In-Migration-5day       | Sum of all users' mobilities into observed department from other departments that last more than 5 day divided by corresponding populations   |
| In-Migration-6day       | Sum of all users' mobilities into observed department from other departments that last more than 6 day divided by corresponding populations   |
| In-Migration-7day       | Sum of all users' mobilities into observed department from other departments that last more than 7 day divided by corresponding populations   |
| In-Migration-8day       | Sum of all users' mobilities into observed department from other departments that last more than 8 day divided by corresponding populations   |
| In-Migration-9days      | Sum of all users' mobilities into observed department from other departments that last more than 9 day divided by corresponding populations   |
| In-Migration-10days     | Sum of all users' mobilities into observed department from other departments that last more than 10 days divided by corresponding populations |
| Activity-All            | Sum of all users' activities (calls/SMS) in department divided by population of department                                                    |
| Activity-Weekday        | Sum of all users' activities (calls/SMS) in department during weekdays divided by population of department                                    |
| Activity-Weekend        | Sum of all users' activities (calls/SMS) in department during weekends divided by population of department                                    |
| Activity-Weekday-00-08h | Sum of all users' activities (calls/SMS) in department during weekdays in 00-08h time interval divided by population of department            |
| Activity-Weekday-08-16h | Sum of all users' activities (calls/SMS) in department during weekdays in 08-16h time interval divided by population of department            |
| Activity-Weekday-16-24h | Sum of all users' activities (calls/SMS) in department during weekdays in 16-24h time interval divided by population of department            |
| Activity-Weekend-00-08h | Sum of all users' activities (calls/SMS) in department during weekends in 00-08h time interval divided by population of department            |

| <b>Feature Name</b>      | <b>Description</b>                                                                                                                 |
|--------------------------|------------------------------------------------------------------------------------------------------------------------------------|
| Activity-Weekend-08-016h | Sum of all users' activities (calls/SMS) in department during weekends in 08-16h time interval divided by population of department |
| Activity-Weekend-16-24h  | Sum of all users' activities (calls/SMS) in department during weekends in 16-24h time interval divided by population of department |
| Activity-Weekday-00h*    | Sum of all users' activities (calls/SMS) in department during weekdays in 00-01h time interval divided by population of department |
| Activity-Weekday-01h     | Sum of all users' activities (calls/SMS) in department during weekdays in 01-02h time interval divided by population of department |
| Activity-Weekday-02h     | Sum of all users' activities (calls/SMS) in department during weekdays in 02-03h time interval divided by population of department |
| Activity-Weekday-03h     | Sum of all users' activities (calls/SMS) in department during weekdays in 03-04h time interval divided by population of department |
| Activity-Weekday-04h     | Sum of all users' activities (calls/SMS) in department during weekdays in 04-05h time interval divided by population of department |
| Activity-Weekday-05h     | Sum of all users' activities (calls/SMS) in department during weekdays in 05-06h time interval divided by population of department |
| Activity-Weekday-06h     | Sum of all users' activities (calls/SMS) in department during weekdays in 06-07h time interval divided by population of department |
| Activity-Weekday-07h     | Sum of all users' activities (calls/SMS) in department during weekdays in 07-08h time interval divided by population of department |
| Activity-Weekday-08h     | Sum of all users' activities (calls/SMS) in department during weekdays in 08-09h time interval divided by population of department |
| Activity-Weekday-09h     | Sum of all users' activities (calls/SMS) in department during weekdays in 09-10h time interval divided by population of department |
| Activity-Weekday-10h     | Sum of all users' activities (calls/SMS) in department during weekdays in 10-11h time interval divided by population of department |
| Activity-Weekday-11h     | Sum of all users' activities (calls/SMS) in department during weekdays in 11-12h time interval divided by population of department |
| Activity-Weekday-12h     | Sum of all users' activities (calls/SMS) in department during weekdays in 12-13h time interval divided by population of department |
| Activity-Weekday-13h     | Sum of all users' activities (calls/SMS) in department during weekdays in 13-14h time interval divided by population of department |
| Activity-Weekday-14h     | Sum of all users' activities (calls/SMS) in department during weekdays in 14-15h time interval divided by population of department |

| <b>Feature Name</b>   | <b>Description</b>                                                                                                                 |
|-----------------------|------------------------------------------------------------------------------------------------------------------------------------|
| Activity-Weekday-15h  | Sum of all users' activities (calls/SMS) in department during weekdays in 15-16h time interval divided by population of department |
| Activity-Weekday-16h  | Sum of all users' activities (calls/SMS) in department during weekdays in 16-17h time interval divided by population of department |
| Activity-Weekday-17h  | Sum of all users' activities (calls/SMS) in department during weekdays in 17-18h time interval divided by population of department |
| Activity-Weekday-18h  | Sum of all users' activities (calls/SMS) in department during weekdays in 18-19h time interval divided by population of department |
| Activity-Weekday-19h  | Sum of all users' activities (calls/SMS) in department during weekdays in 19-20h time interval divided by population of department |
| Activity-Weekday-20h  | Sum of all users' activities (calls/SMS) in department during weekdays in 20-21h time interval divided by population of department |
| Activity-Weekday-21h  | Sum of all users' activities (calls/SMS) in department during weekdays in 21-22h time interval divided by population of department |
| Activity-Weekday-22h  | Sum of all users' activities (calls/SMS) in department during weekdays in 22-23h time interval divided by population of department |
| Activity-Weekday-23h  | Sum of all users' activities (calls/SMS) in department during weekdays in 23-24h time interval divided by population of department |
| Activity-Weekend-00h* | Sum of all users' activities (calls/SMS) in department during weekends in 00-01h time interval divided by population of department |
| Activity-Weekend-01h* | Sum of all users' activities (calls/SMS) in department during weekends in 01-02h time interval divided by population of department |
| Activity-Weekend-02h* | Sum of all users' activities (calls/SMS) in department during weekends in 02-03h time interval divided by population of department |
| Activity-Weekend-03h  | Sum of all users' activities (calls/SMS) in department during weekends in 03-04h time interval divided by population of department |
| Activity-Weekend-04h  | Sum of all users' activities (calls/SMS) in department during weekends in 04-05h time interval divided by population of department |
| Activity-Weekend-05h  | Sum of all users' activities (calls/SMS) in department during weekends in 05-06h time interval divided by population of department |
| Activity-Weekend-06h  | Sum of all users' activities (calls/SMS) in department during weekends in 06-07h time interval divided by population of department |
| Activity-Weekend-07h  | Sum of all users' activities (calls/SMS) in department during weekends in 07-08h time interval divided by population of department |

| <b>Feature Name</b>  | <b>Description</b>                                                                                                                 |
|----------------------|------------------------------------------------------------------------------------------------------------------------------------|
| Activity-Weekend-08h | Sum of all users' activities (calls/SMS) in department during weekends in 08-09h time interval divided by population of department |
| Activity-Weekend-09h | Sum of all users' activities (calls/SMS) in department during weekends in 09-10h time interval divided by population of department |
| Activity-Weekend-10h | Sum of all users' activities (calls/SMS) in department during weekends in 10-11h time interval divided by population of department |
| Activity-Weekend-11h | Sum of all users' activities (calls/SMS) in department during weekends in 11-12h time interval divided by population of department |
| Activity-Weekend-12h | Sum of all users' activities (calls/SMS) in department during weekends in 12-13h time interval divided by population of department |
| Activity-Weekend-13h | Sum of all users' activities (calls/SMS) in department during weekends in 13-14h time interval divided by population of department |
| Activity-Weekend-14h | Sum of all users' activities (calls/SMS) in department during weekends in 14-15h time interval divided by population of department |
| Activity-Weekend-15h | Sum of all users' activities (calls/SMS) in department during weekends in 15-16h time interval divided by population of department |
| Activity-Weekend-16h | Sum of all users' activities (calls/SMS) in department during weekends in 16-17h time interval divided by population of department |
| Activity-Weekend-17h | Sum of all users' activities (calls/SMS) in department during weekends in 17-18h time interval divided by population of department |
| Activity-Weekend-18h | Sum of all users' activities (calls/SMS) in department during weekends in 18-19h time interval divided by population of department |
| Activity-Weekend-19h | Sum of all users' activities (calls/SMS) in department during weekends in 19-20h time interval divided by population of department |
| Activity-Weekend-20h | Sum of all users' activities (calls/SMS) in department during weekends in 20-21h time interval divided by population of department |
| Activity-Weekend-21h | Sum of all users' activities (calls/SMS) in department during weekends in 21-22h time interval divided by population of department |
| Activity-Weekend-22h | Sum of all users' activities (calls/SMS) in department during weekends in 22-23h time interval divided by population of department |
| Activity-Weekend-23h | Sum of all users' activities (calls/SMS) in department during weekends in 23-24h time interval divided by population of department |

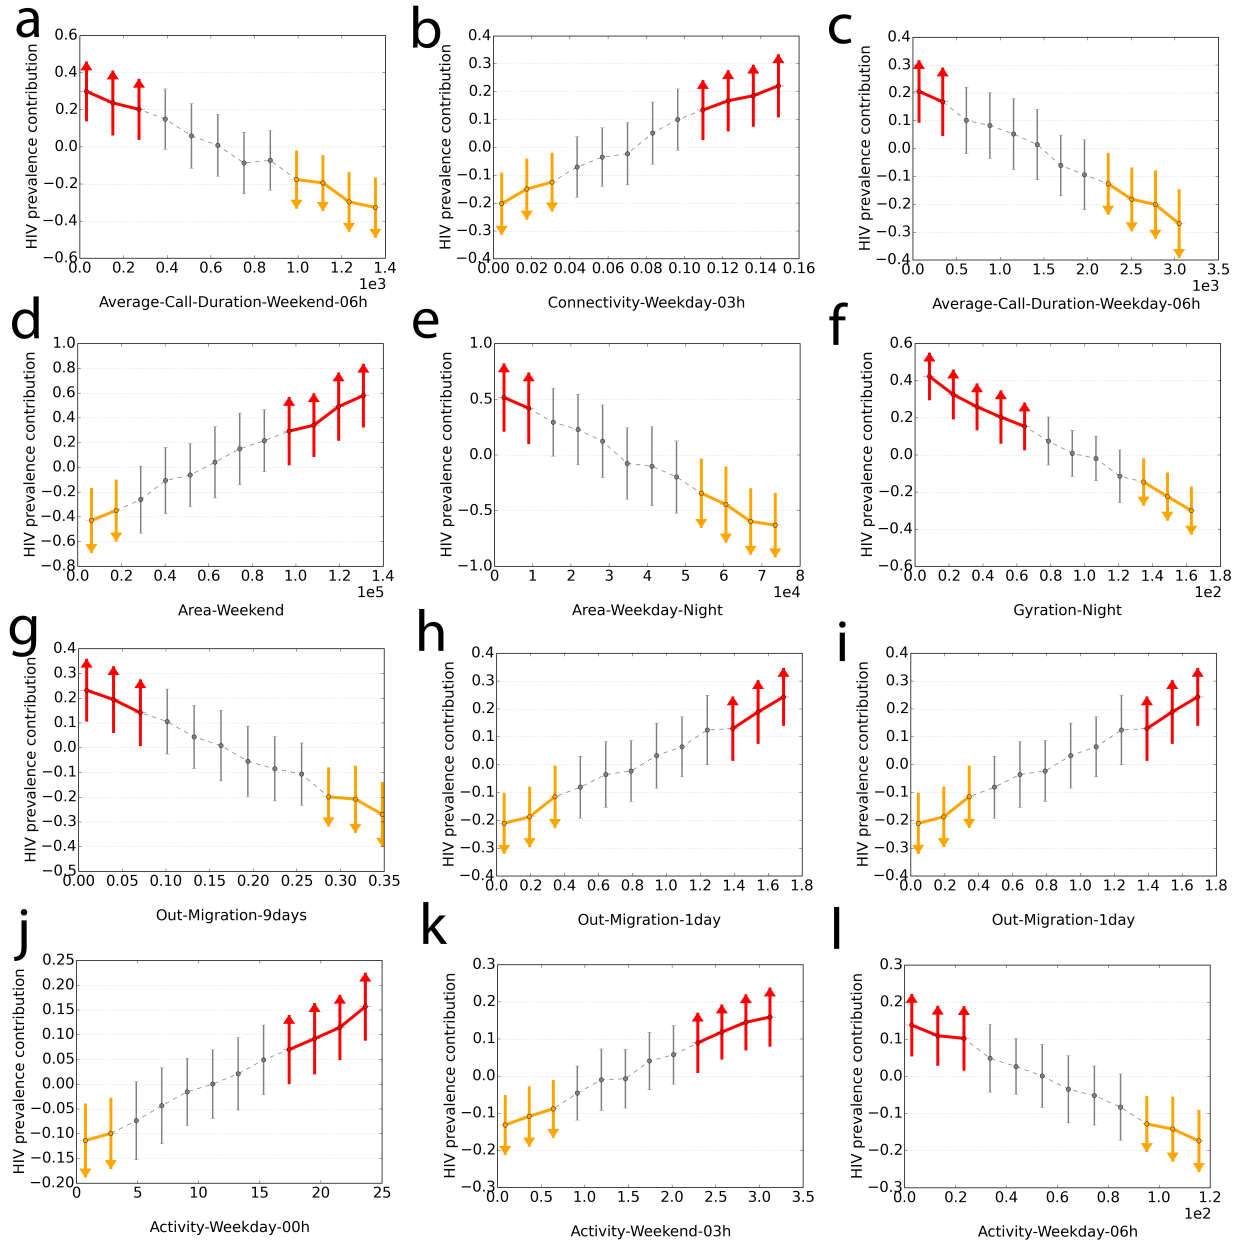

Figure S2: Feature contribution graphs for 12 features; ranked from 4<sup>th</sup> to 6<sup>th</sup> place for 4 types of features. Points correspond to mean contribution and error bars correspond to standard deviation. Red color indicates strong association to higher HIV, and orange to lower HIV prevalence.
